# Supplementary material for: The oncogene KRAS promotes cancer cell dissemination by stabilizing spheroid formation via the MEK pathway
Source: Springer Nature journal article supplement (doi:10.1186/s12885-018-4922-4), 2018-12-01

Fig. S3

a

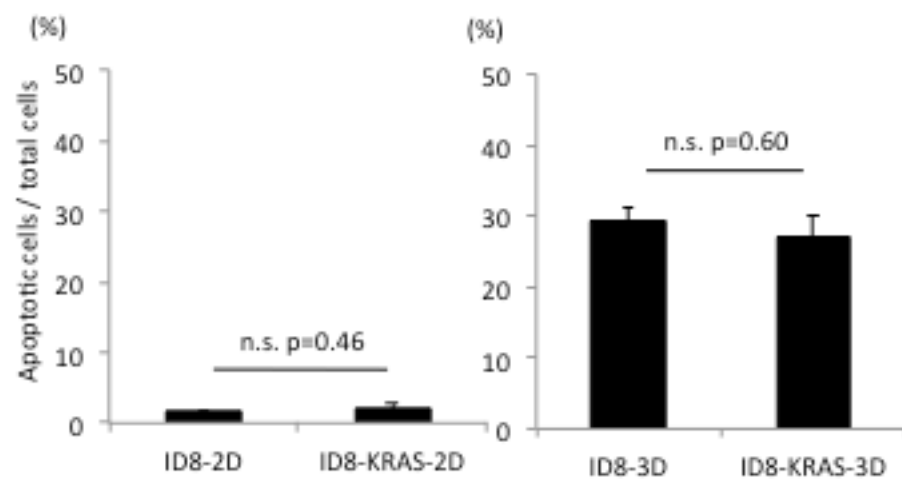

b

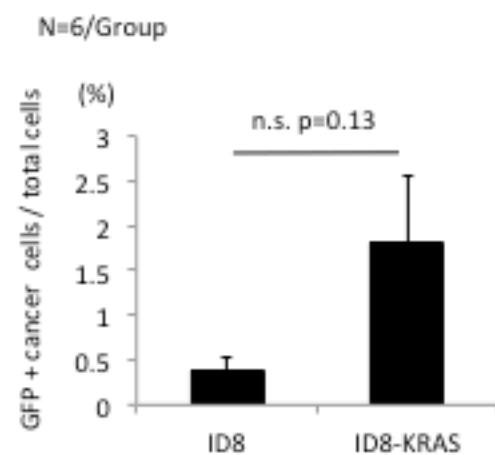

c

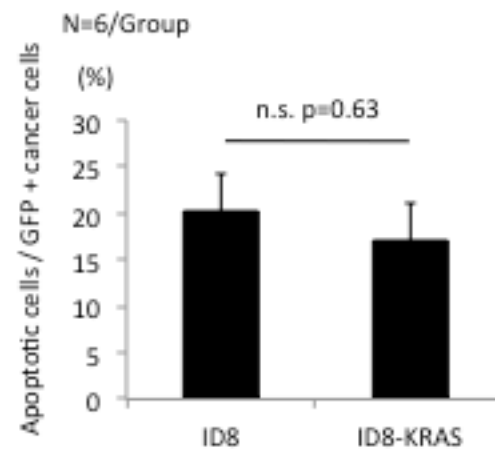

Supplement: MOESM6 [file 16312086]
